# Supplementary material for: Colorimetric determination of xanthine with xanthine oxidase and WSe2 nanosheets as a peroxidase mimic
Source: Royal Society of Chemistry journal article supplement (doi:10.1039/d1nj00819f), 2021-01-01
Supplement: d1nj00819f1.pdf [file d1nj00819f1.pdf]

Electronic Supplementary Information (ESI) for:

**Colorimetric determination of xanthine with xanthine oxidase and WSe<sub>2</sub> nanosheets as a peroxidase mimic**

Chengyi Hong<sup>1†</sup>, Lingyan Guan<sup>1</sup>, Lei Huang<sup>1</sup>, Xiaoshan Hong<sup>1</sup>, Zhiyong Huang<sup>1</sup>

1. College of Food and Biological Engineering, Jimei University, Xiamen, 361021, China.

<sup>†</sup> Corresponding author.

E-mail address: cyhong@jmu.edu.cn (C. Y. Hong).

## Supporting Figures

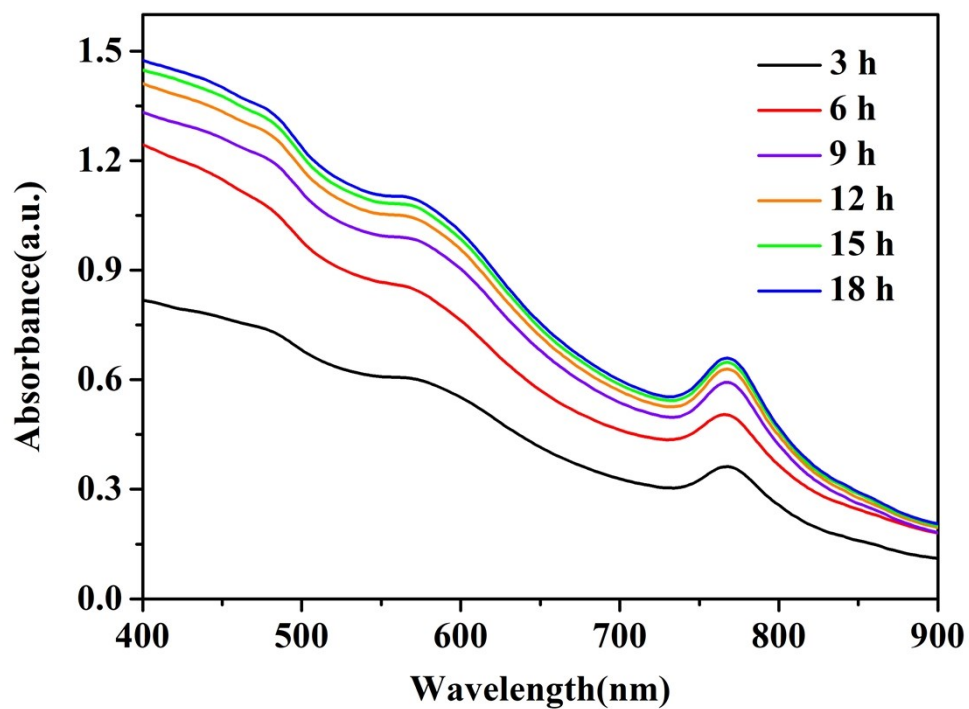

**Fig. S1.** The UV-Vis absorption spectra of WSe<sub>2</sub> nanosheets after different sonication times.

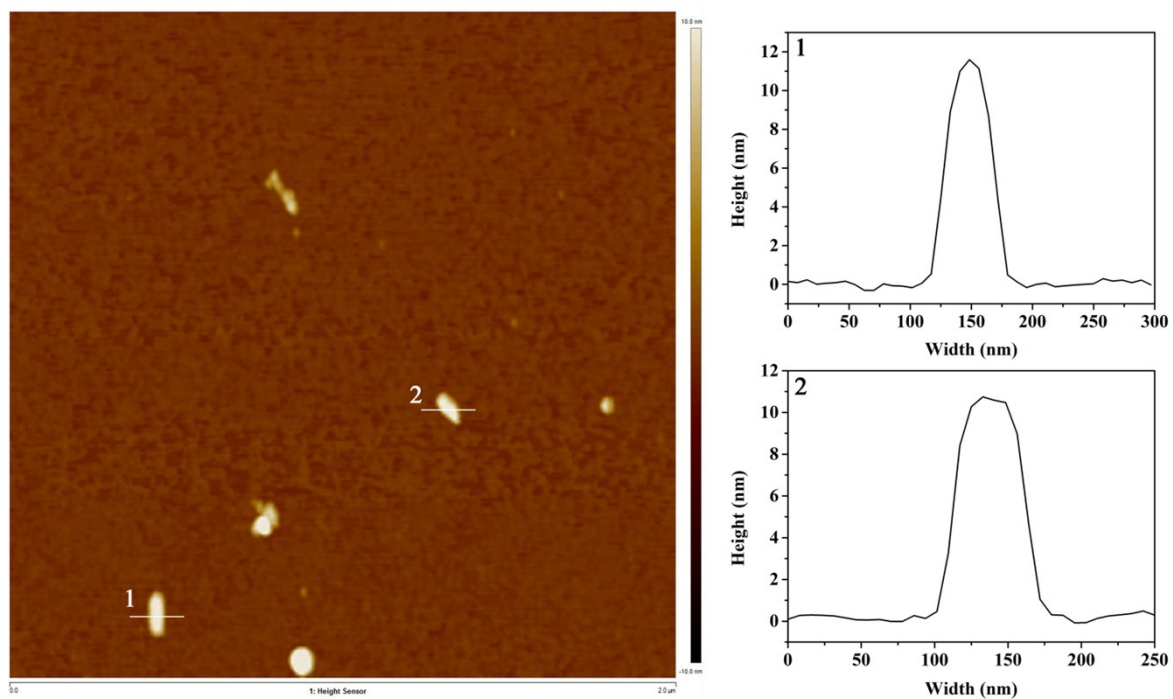

**Fig. S2.** The AFM image of WSe<sub>2</sub> nanosheets.

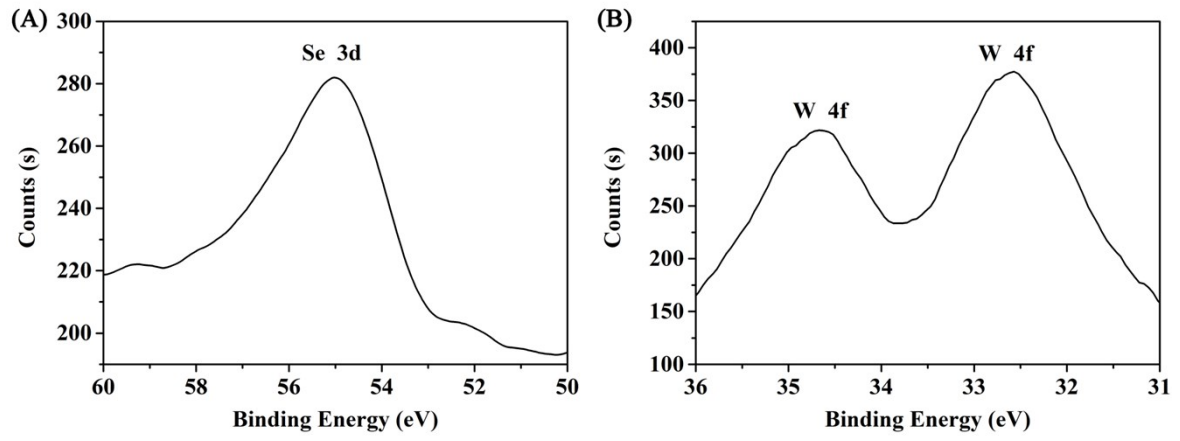

**Fig. S3.** The XPS spectrum of WSe<sub>2</sub> nanosheets.

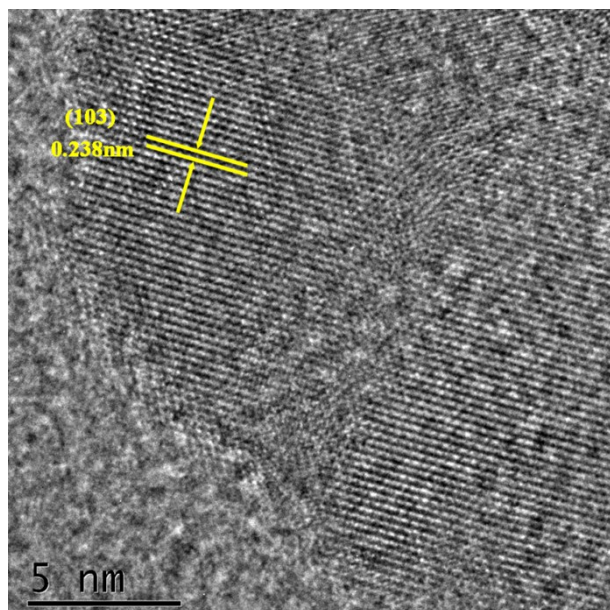

**Fig. S4.** The high-resolution transmission electron microscope of WSe<sub>2</sub> nanosheets.

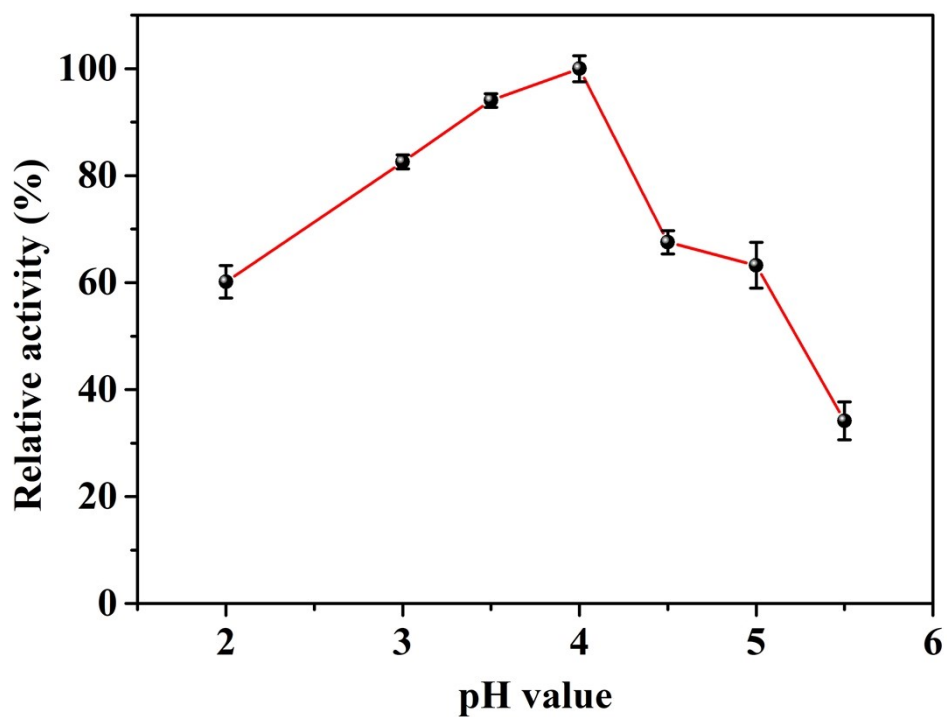

**Fig. S5.** Effects of pH value on relative peroxidase mimic activity of WSe<sub>2</sub> nanosheets. Experiments were performed using WSe<sub>2</sub> nanosheets (30  $\mu\text{g mL}^{-1}$ ) in 250  $\mu\text{L}$  NaAc-HAc (0.2 M) with TMB (1 mM) as substrate.

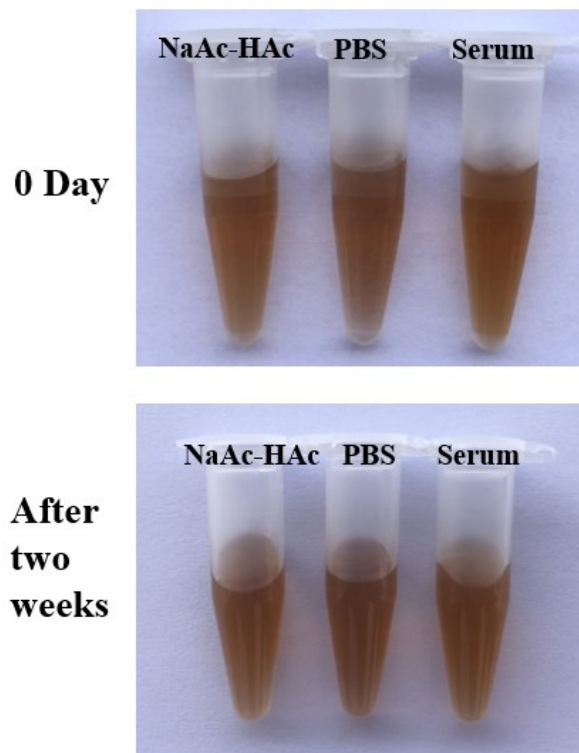

**Fig. S6.** Photos of WSe<sub>2</sub> nanosheets in NaAc-HAc buffer, PBS and serum.

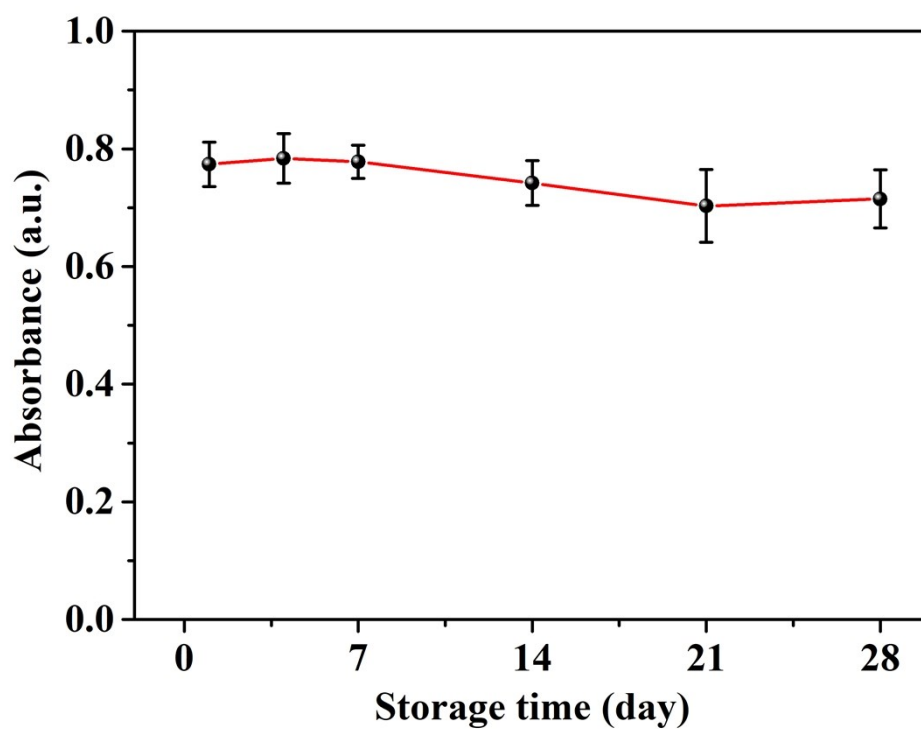

**Fig. S7.** The stability of enzyme mimic of WSe<sub>2</sub> nanosheets for xanthine detection. The concentration of xanthine was 0.5 mM.



**Table S1.** Comparison of kinetic parameters of WSe<sub>2</sub> nanosheets and other materials.

| Materials                                     | Substrate                     | $K_m$ (mM) | $V_{max}$ (10 <sup>-8</sup> Ms <sup>-1</sup> ) | Ref.      |
|-----------------------------------------------|-------------------------------|------------|------------------------------------------------|-----------|
| HRP                                           | TMB                           | 0.434      | 10.0                                           | 1         |
|                                               | H <sub>2</sub> O <sub>2</sub> | 3.70       | 8.71                                           |           |
| Pd nanoparticle                               | TMB                           | 1.44       | 0.0024                                         | 2         |
|                                               | H <sub>2</sub> O <sub>2</sub> | 42.7       | 0.00389                                        |           |
| Ir nanoparticle                               | TMB                           | 0.03       | 0.017                                          | 3         |
|                                               | H <sub>2</sub> O <sub>2</sub> | 18.02      | 0.081                                          |           |
| BSA-Au cluster                                | TMB                           | 0.00253    | 6.23                                           | 4         |
|                                               | H <sub>2</sub> O <sub>2</sub> | 25.3       | 7.21                                           |           |
| Se-g-C <sub>3</sub> N <sub>4</sub> nanosheets | TMB                           | 0.307      | 0.00205                                        | 5         |
|                                               | H <sub>2</sub> O <sub>2</sub> | 0.298      | 0.00433                                        |           |
| WO <sub>3</sub> nanosheets                    | TMB                           | 10.6       | 1.53                                           | 6         |
|                                               | H <sub>2</sub> O <sub>2</sub> | 1260       | 3                                              |           |
| Rh nanosheets                                 | TMB                           | 0.264      | 12.56                                          | 7         |
|                                               | H <sub>2</sub> O <sub>2</sub> | 4.51       | 68.09                                          |           |
| MoSe <sub>2</sub> nanosheets                  | TMB                           | 0.014      | 0.56                                           | 8         |
|                                               | H <sub>2</sub> O <sub>2</sub> | 0.155      | 0.99                                           |           |
| WSe <sub>2</sub> nanosheets                   | TMB                           | 0.205      | 1.25                                           | This work |
|                                               | H <sub>2</sub> O <sub>2</sub> | 0.746      | 0.484                                          |           |

**Table S2.** Comparison of previous methods for determination of xanthine.

| Method                                        | Dynamic range ( $\mu\text{M}$ ) | Linear range ( $\mu\text{M}$ ) | LOD ( $\mu\text{M}$ ) | Real sample  | Reference |
|-----------------------------------------------|---------------------------------|--------------------------------|-----------------------|--------------|-----------|
| Pd nanoparticle                               | -                               | 1-50                           | 0.29                  | Urine        | 2         |
| Ir nanoparticle                               | 10-150                          | 10-150                         | 5.2                   | -            | 3         |
| BSA-Au cluster                                | 0-800                           | 0.5-20                         | 0.5                   | Urine, Serum | 4         |
| Se-g-C <sub>3</sub> N <sub>4</sub> nanosheets | 0-1600                          | 0.16-40                        | 0.016                 | Serum        | 5         |
| WO <sub>3</sub> nanosheets                    | 0-400                           | 25-200                         | 1.24                  | Urine        | 6         |
| Rh nanosheets                                 | 0-500                           | 2.0-80                         | 0.73                  | -            | 7         |
| MoSe <sub>2</sub> nanosheets                  | 0-1200                          | 10-320                         | 1.964                 | Serum        | 8         |
| WSe <sub>2</sub> nanosheets                   | 0-1000                          | 10-500                         | 4.37                  | Serum        | This work |

## References

- 1 L. Gao, J. Zhuang and L. Nie, Intrinsic peroxidase-like activity of ferromagnetic nanoparticles, *Nat.Nanotechnol.*, 2007, **2**, 577-583.
- 2 W. J. Shi, H. Fan and S. Y. Ai, Pd nanoparticles supported on nitrogen, sulfur-doped three-dimensional hierarchical nanostructures as peroxidase-like catalysts for colorimetric detection of xanthine, *RSC Adv.*, 2015, **5**, 32183-32190.
- 3 M. Cui, J. Zhou and Y. Zhao, Facile synthesis of iridium nanoparticles with superior peroxidase-like activity for colorimetric determination of H<sub>2</sub>O<sub>2</sub> and xanthine, *Sens. Actuators B Chem.*, 2017, **243**, 203-210.
- 4 X. X. Wang, Q. Wu and Z. Shan, BSA-stabilized Au clusters as peroxidase mimetics for use in xanthine detection, *Biosens. Bioelectron.*, 2011, **26**, 3614-3619.
- 5 F. Qiao, J. Wang and S. Ai, As a new peroxidase mimetics: The synthesis of selenium doped graphitic carbon nitride nanosheets and applications on colorimetric detection of H<sub>2</sub>O<sub>2</sub> and xanthine, *Sens. Actuators B Chem.*, 2015, **216**, 418-427.
- 6 Z. Li, X. Liu and X. H. Liang, Colorimetric determination of xanthine in urine based on peroxidase-like activity of WO<sub>3</sub> nanosheets, *Talanta*, 2019, **204**, 278-284.
- 7 S. Cai, W. Xiao and H. Duan, Single-layer Rh nanosheets with ultrahigh peroxidase-like activity for colorimetric biosensing, *Nano Res.*, 2018, **011**, 6304-6315.
- 8 G. Yang, X. J. Wu and T. M. Chen, Few-layered MoSe<sub>2</sub> nanosheets as an efficient peroxidase nanozyme for highly sensitive colorimetric detection of H<sub>2</sub>O<sub>2</sub> and xanthine, *J. Mater. Chem. B*, 2018, **6**, 105-111.
